# Supplementary material for: Cyano-bridged perovskite [(CH3)3NOH]2[KM(CN)6], [M: Fe(iii), and Co(iii)] for high-temperature multi-axial ferroelectric applications with enhanced thermal and nonlinear optical performance
Source: Royal Society of Chemistry journal article supplement (doi:10.1039/d0tc04527f), 2020-01-01
Supplement: d0tc04527f1.pdf [file d0tc04527f1.pdf]

## Supplementary Information Materials

### Cyano-bridged perovskite $[(\text{CH}_3)_3\text{NOH}]_2[\text{KM}(\text{CN})_6]$ , [M: Fe(III), Co(III)] for high-temperature multi-axial ferroelectric applications with enhanced thermal and nonlinear optical performance

Magdalena Rok, Agnieszka Cizman, Bartosz Zarychta, Jan K. Zaręba, Monika Trzebiatowska, Mirosław Mączka, Alessandro Stroppa, Shurong Yuan, Anthony E. Phillips, Grażyna Bator

#### CAPTIONS OF FIGURES

|                                                                                                                                                                                                                                                                                                                                                                                                                                                                                      |    |
|--------------------------------------------------------------------------------------------------------------------------------------------------------------------------------------------------------------------------------------------------------------------------------------------------------------------------------------------------------------------------------------------------------------------------------------------------------------------------------------|----|
| <b>Fig. S1.</b> X-ray diffraction pattern at 298 K of <b>TMAO-Co</b> (black) and calculated from crystal structure <b>TMAO-Fe</b> (red) presented in ref. <sup>1</sup> .....                                                                                                                                                                                                                                                                                                         | 2  |
| <b>Fig. S2.</b> The results of the simultaneous TGA/DSC analyses for <b>TMAO-Co</b> (sample mass $m = 11.9960$ mg, 5K/min.) .....                                                                                                                                                                                                                                                                                                                                                    | 3  |
| <b>Fig. S3.</b> Spectra obtained upon irradiation with the 1250 nm femtosecond laser pulses for <b>TMAO-Co</b> between 303K and 427K a) heating runs and b) cooling runs. ....                                                                                                                                                                                                                                                                                                       | 7  |
| <b>Fig. S4.</b> a) Plots of integral intensity of SHG signal of <b>TMAO-Fe</b> for heating and cooling runs. b) Spectra obtained upon irradiation with 1250 nm femtosecond laser pulses of <b>TMAO-Fe</b> between 338 and 413 K on heating. c) Spectra obtained upon irradiation with 1250 nm femtosecond laser pulses of <b>TMAO-Fe</b> between 338 and 411 K on cooling. ....                                                                                                      | 8  |
| <b>Fig. S5.</b> SHG traces for <b>TMAO-Fe</b> (green), <b>TMAO-Co</b> (red) and that of KDP (black) obtained upon irradiation with 1250 nm femtosecond laser pulses. Signal collection time was equal to 6000 ms for <b>TMAO-Co</b> and <b>TMAO-Fe</b> , and 1200 ms for KDP; for clarity of presentation signal intensities are not normalized to the same integration time. ....                                                                                                   | 9  |
| <b>Fig. S6.</b> a) The room-temperature FT-Raman spectra for <b>TMAO-Co</b> and <b>TMAO-Fe</b> . The insert shows the details of the most intense Raman bands. b) The room-temperature FT-IR spectra in KBr pellets and the 3300-400 $\text{cm}^{-1}$ range. The insert shows the details of the most intense IR bands. c) The room-temperature FT-IR spectra of the studied compounds in Nujol mull and the 3300-400 $\text{cm}^{-1}$ range. The asterisks denote Nujol bands. .... | 17 |
| <b>Fig. S7.</b> The temperature-dependent IR spectra of a) <b>TMAO-Co</b> and b) <b>TMAO-Fe</b> . ....                                                                                                                                                                                                                                                                                                                                                                               | 18 |

#### CAPTIONS OF TABLES

|                                                                                                                                                                                                                                                          |    |
|----------------------------------------------------------------------------------------------------------------------------------------------------------------------------------------------------------------------------------------------------------|----|
| <b>Table S1.</b> Thermodynamic parameters of the phase transitions for <b>TMAO-Co</b> . ....                                                                                                                                                             | 3  |
| <b>Table S2.</b> Experimental details <b>TMAO-Co</b> . ....                                                                                                                                                                                              | 4  |
| <b>Table S3.</b> Selected geometric parameters ( $\text{\AA}$ , $^\circ$ ) for <b>TMAO-Co</b> . ....                                                                                                                                                     | 5  |
| <b>Table S4.</b> Selected hydrogen-bond parameters for <b>TMAO-Co</b> . ....                                                                                                                                                                             | 6  |
| <b>Table S5.</b> Ferroelectric polarization of <b>TMAO-M</b> , calculated by DFT and a simple point-charge model. All values are given in units of $\mu\text{C cm}^{-2}$ . ....                                                                          | 10 |
| <b>Table S6.</b> Normal modes of <b>TMAO-M</b> compounds (M=Co, Fe) in the phase I (II). The IR-active modes are marked in red, the Raman-active in blue, the modes active in both IR and Raman spectra are in green and the silent ones - in black..... | 11 |

**Table S7.** The room-temperature FT-IR and FT-Raman modes (in  $\text{cm}^{-1}$ ) of **TMAO-M**, where  $M=\text{Co}, \text{Fe}$ , and their proposed assignment. The modes involving vibrations of  $\text{CN}^-$  ions are denoted by red color.

..... 12

**Table S8.** The observed IR and Raman modes (in  $\text{cm}^{-1}$ ) of **TMAO-Co** and their proposed assignment.

..... 13

**Table S9.** The observed IR modes (in  $\text{cm}^{-1}$ ) of **TMAO-Fe** and their proposed assignment. .... 15

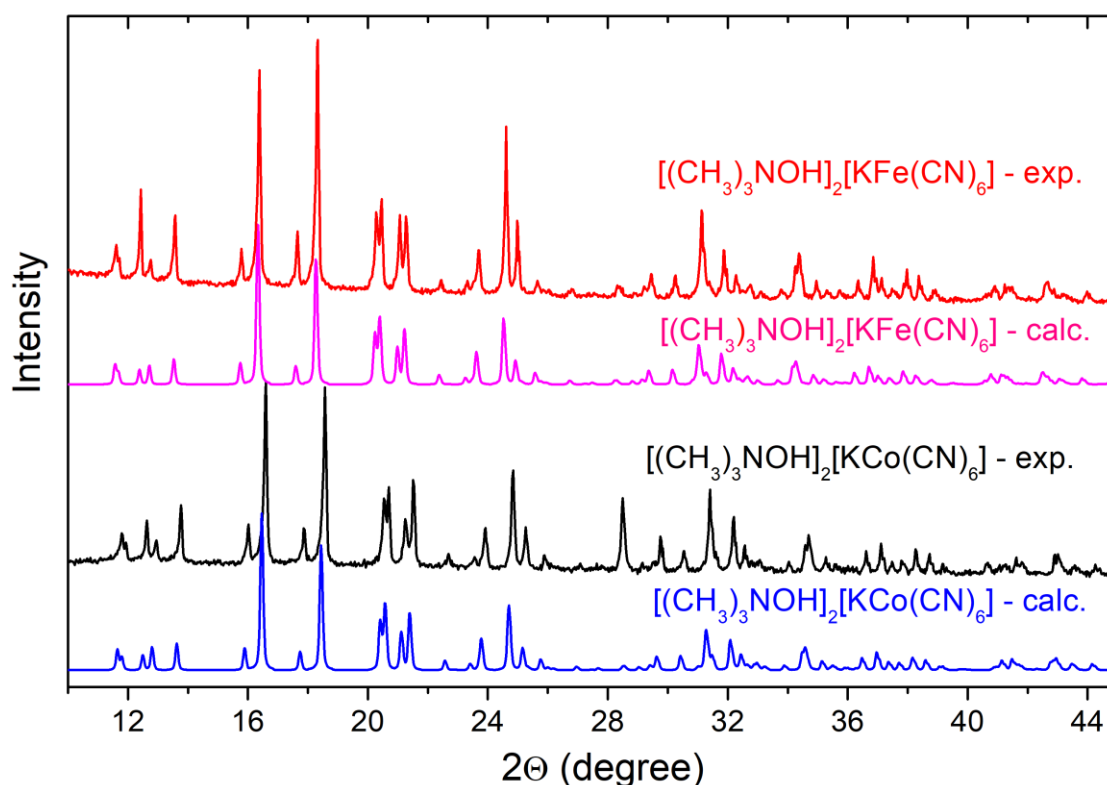

**Fig. S1.** X-ray diffraction pattern at 298 K of **TMAO-Co** (black) and calculated from crystal structure **TMAO-Fe** (red) presented in ref. <sup>1</sup>

- (1) Xu, W. J.; Li, P. F.; Tang, Y. Y.; Zhang, W. X.; Xiong, R. G.; Chen, X. M. A Molecular Perovskite with Switchable Coordination Bonds for High-Temperature Multiaxial Ferroelectrics. *J. Am. Chem. Soc.* **2017**, *139*, 6369–6375.

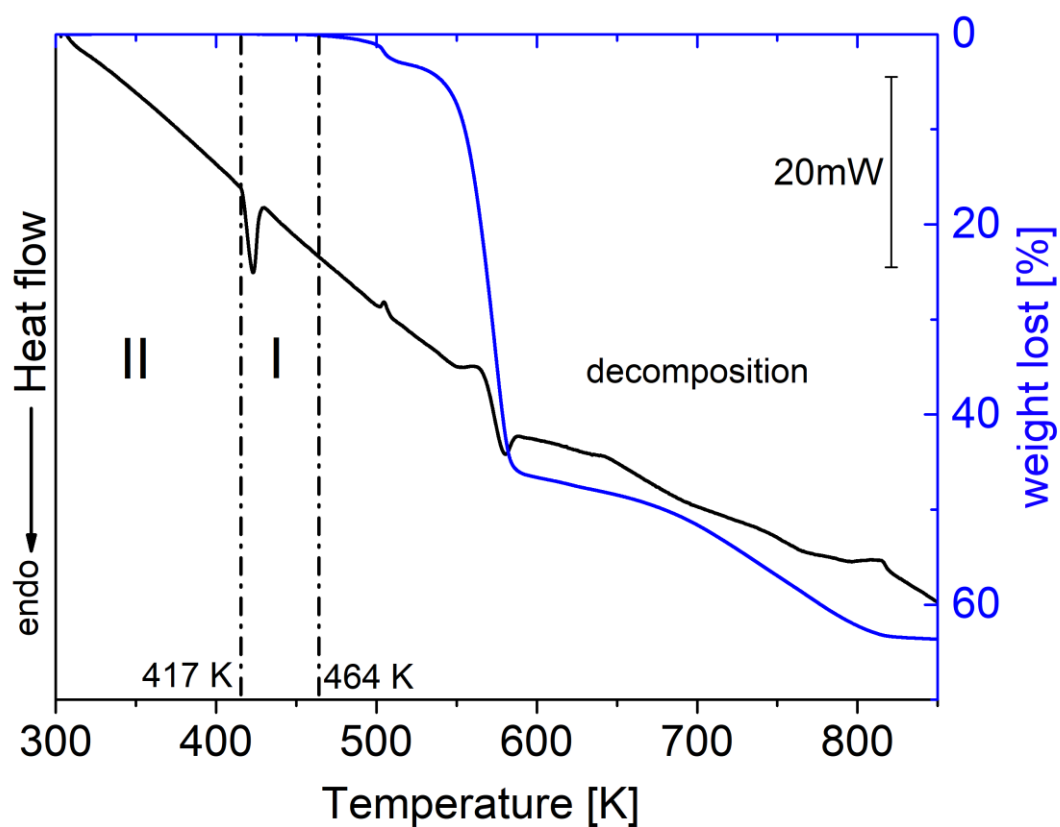

**Fig. S2.** The results of the simultaneous TGA/DSC analyses for **TMAO-Co** (sample mass  $m = 11.9960$  mg, 5K/min.)

**Table S1.** Thermodynamic parameters of the phase transitions for **TMAO-Co**.

| PT                                                 | II $\rightarrow$ I |         |
|----------------------------------------------------|--------------------|---------|
| runs                                               | cooling            | heating |
| M [g/mol]                                          | 406.39             |         |
| T [K]                                              | 409                | 417     |
| $\Delta H$ [J $\cdot$ g $^{-1}$ ]                  | 71.5               | 75.5    |
| $\Delta H$ [kJ $\cdot$ mol $^{-1}$ ]               | 29.1               | 30.7    |
| $\Delta S$ [J $\cdot$ mol $^{-1}\cdot$ K $^{-1}$ ] | 71.0               | 73.6    |

**Table S2.** Experimental details **TMAO-Co**.

|                                                                            | (II)                                                                   | (I)                                                              |
|----------------------------------------------------------------------------|------------------------------------------------------------------------|------------------------------------------------------------------|
| <b>Crystal data</b>                                                        |                                                                        |                                                                  |
| Chemical formula                                                           | C <sub>12</sub> H <sub>20</sub> CoKN <sub>8</sub> O <sub>2</sub>       | C <sub>12</sub> H <sub>20</sub> CoKN <sub>8</sub> O <sub>2</sub> |
| $M_r$                                                                      | 406.39                                                                 | 406.39                                                           |
| Crystal system, space group                                                | Monoclinic, <i>Cc</i>                                                  | Cubic, <i>Fm<math>\bar{3}m</math></i>                            |
| Temperature (K)                                                            | 100.0(1)                                                               | 440                                                              |
| $a, b, c$ (Å)                                                              | 15.1774 (9), 8.8150 (5), 14.3489 (9)                                   | 12.3427 (4), 12.3427 (4), 12.3427 (4)                            |
| $\alpha, \beta, \gamma$ (°)                                                | 90, 98.532 (6), 90                                                     | 90, 90, 90                                                       |
| $V$ (Å <sup>3</sup> )                                                      | 1898.5 (2)                                                             | 1880.31 (18)                                                     |
| $Z$                                                                        | 4                                                                      | 4                                                                |
| Radiation type                                                             | Mo $K\alpha$                                                           | Mo $K\alpha$                                                     |
| $\mu$ (mm <sup>-1</sup> )                                                  | 1.15                                                                   | 1.16                                                             |
| Crystal size (mm)                                                          | 0.23 x 0.15 x 0.12                                                     | 0.23 x 0.18 x 0.10                                               |
| <b>Data collection</b>                                                     |                                                                        |                                                                  |
| Diffractometer                                                             |                                                                        | Xcalibur CCD                                                     |
| Absorption correction                                                      |                                                                        | SCALE3 ABSPACK                                                   |
| min/max                                                                    | 0.5609/1.0000                                                          | 0.7512/1.0000                                                    |
| No. of measured, independent and observed [ $I > 2\sigma(I)$ ] reflections | 6865, 2724, 2297                                                       | 9110, 218, 121                                                   |
| $R_{int}$                                                                  | 0.064                                                                  | 0.041                                                            |
| $(\sin \theta/\lambda)_{max}$ (Å <sup>-1</sup> )                           | 0.617                                                                  | 0.760                                                            |
| <b>Refinement</b>                                                          |                                                                        |                                                                  |
| $R[F^2 > 2\sigma(F^2)], wR(F^2), S$                                        | 0.041, 0.095, 0.96                                                     | 0.038, 0.108, 1.06                                               |
| No. of reflections                                                         | 2724                                                                   | 218                                                              |
| No. of parameters                                                          | 224                                                                    | 22                                                               |
| No. of restraints                                                          | 2                                                                      | 0                                                                |
| H-atom treatment                                                           | H atoms treated by a mixture of independent and constrained refinement | H-atom parameters constrained                                    |
| $\Delta\rho_{max}, \Delta\rho_{min}$ (e Å <sup>-3</sup> )                  | 0.38, -0.35                                                            | 0.23, -0.18                                                      |
| Absolute structure                                                         | Classical Flack method preferred over Parsons because s.u. lower.      |                                                                  |
| Absolute structure parameter                                               | 0.11 (3)                                                               |                                                                  |

Computer programs: *SHELXL2013* (Sheldrick, 2013).

**Table S3.** Selected geometric parameters (Å, °) for **TMAO-Co**.

| II - phase               |              |            |                                        |              |            |
|--------------------------|--------------|------------|----------------------------------------|--------------|------------|
| Bond                     | Experimental | Calculated | Bond                                   | Experimental | Calculated |
| Co1—C2                   | 1.885 (7)    | 1.8574     | N5—C5                                  | 1.138 (9)    | 1.1758     |
| Co1—C6                   | 1.885 (8)    | 1.8581     | N6—C6                                  | 1.155 (9)    | 1.1747     |
| Co1—C4                   | 1.899 (8)    | 1.8821     | N10—O10                                | 1.414 (9)    | 1.4323     |
| Co1—C1                   | 1.904 (8)    | 1.8827     | N10—C10                                | 1.484 (9)    | 1.4912     |
| Co1—C3                   | 1.906 (8)    | 1.8836     | N10—C12                                | 1.485 (9)    | 1.4921     |
| Co1—C5                   | 1.909 (8)    | 1.8821     | N10—C11                                | 1.503 (11)   | 1.4958     |
| N1—C1                    | 1.157 (10)   | 1.1741     | N11—O11                                | 1.431 (9)    | 1.4322     |
| N1—K1                    | 2.828 (8)    | 2.7961     | N11—C14                                | 1.477 (10)   | 1.4924     |
| C2—N2                    | 1.163 (9)    | 1.1743     | N11—C15                                | 1.479 (9)    | 1.4963     |
| N3—C3                    | 1.141 (10)   | 1.1752     | N11—C13                                | 1.493 (9)    | 1.4911     |
| C4—N4                    | 1.152 (9)    | 1.1760     |                                        |              |            |
| Angles                   | Experimental | Calculated | Angles                                 | Experimental | Calculated |
| C2—Co1—C6                | 91.4 (3)     | 92.94      | N3—C3—Co1                              | 176.6 (7)    | 174.48     |
| C2—Co1—C4                | 175.1 (3)    | 173.64     | N4—C4—Co1                              | 175.8 (7)    | 175.44     |
| C6—Co1—C4                | 91.1 (3)     | 90.75      | N5—C5—Co1                              | 174.4 (7)    | 174.10     |
| C2—Co1—C1                | 87.9 (3)     | 90.94      | N6—C6—Co1                              | 177.3 (7)    | 177.76     |
| C6—Co1—C1                | 88.5 (3)     | 86.04      | O10—N10—C10                            | 110.0 (6)    | 105.57     |
| C4—Co1—C1                | 88.0 (3)     | 94.48      | O10—N10—C12                            | 110.6 (7)    | 109.23     |
| C2—Co1—C3                | 91.0 (3)     | 87.28      | C10—N10—C12                            | 110.9 (6)    | 110.36     |
| C6—Co1—C3                | 86.9 (3)     | 88.75      | O10—N10—C11                            | 104.6 (6)    | 109.73     |
| C4—Co1—C3                | 93.4 (3)     | 87.63      | C10—N10—C11                            | 109.5 (7)    | 110.55     |
| C1—Co1—C3                | 175.2 (3)    | 174.40     | C12—N10—C11                            | 111.0 (6)    | 111.23     |
| C2—Co1—C5                | 88.5 (3)     | 88.32      | N10—O10—K1 <sup>ix</sup>               | 134.8 (4)    | 134.09     |
| C6—Co1—C5                | 176.0 (3)    | 173.81     | O11—N11—C14                            | 104.2 (5)    | 109.20     |
| C4—Co1—C5                | 89.2 (3)     | 88.56      | O11—N11—C15                            | 109.1 (6)    | 109.74     |
| C1—Co1—C5                | 95.5 (3)     | 87.88      | C14—N11—C15                            | 111.7 (6)    | 111.50     |
| C3—Co1—C5                | 89.1 (3)     | 97.36      | O11—N11—C13                            | 109.6 (6)    | 105.35     |
| C1—N1—K1                 | 168.0 (7)    | 150.55     | C14—N11—C13                            | 110.8 (6)    | 110.39     |
| N1—C1—Co1                | 175.0 (7)    | 176.24     | C15—N11—C13                            | 111.1 (6)    | 110.47     |
| N2—C2—Co1                | 178.1 (6)    | 177.82     |                                        |              |            |
| I phase                  |              |            |                                        |              |            |
| Bond                     | Experimental |            | Bond                                   | Experimental |            |
| Co1—C1                   | 1.911 (4)    |            | N10—O10                                | 1.36 (3)     |            |
| K1—N1                    | 3.115 (3)    |            | N10—C10                                | 1.55 (3)     |            |
| N1—C1                    | 1.145 (5)    |            |                                        |              |            |
| Angles                   | Experimental |            | Angles                                 | Experimental |            |
| C1—Co1—C1 <sup>i</sup>   | 90.0         |            | N1 <sup>iii</sup> —K1—N1 <sup>iv</sup> | 180.0        |            |
| C1—Co1—C1 <sup>ii</sup>  | 180.0        |            | O10 <sup>v</sup> —N10—O10              | 119.6 (2)    |            |
| N1 <sup>iii</sup> —K1—N1 | 90.0         |            | O10—N10—O10                            | 117.98 (17)  |            |

Symmetry code(s): (i)  $-y+3/2, -z+3/2, -x+1$ ; (ii)  $-x+1, -y+2, -z+1$ ; (iii)  $-y+1, -z+1, -x+1$ ; (iv)  $y, z, x$ ; (v)  $-y+1, z, -x+1$ .

**Table S4.** Selected hydrogen-bond parameters for **TMAO-Co**.

| <i>D</i> —H··· <i>A</i>     | <i>D</i> —H (Å) | H··· <i>A</i> (Å) | <i>D</i> ··· <i>A</i> (Å) | <i>D</i> —H··· <i>A</i> (°) |
|-----------------------------|-----------------|-------------------|---------------------------|-----------------------------|
| <b>II-phase</b>             |                 |                   |                           |                             |
| O10—H10A···N6               | 0.82            | 1.82              | 2.642 (8)                 | 175.4                       |
| O11—H11A···N2               | 0.82            | 1.81              | 2.628 (8)                 | 172.2                       |
| C13—H00O···N6 <sup>i</sup>  | 0.96            | 2.69              | 3.601 (10)                | 157.9                       |
| <b>I-phase</b>              |                 |                   |                           |                             |
| C10—H10B···N1 <sup>ii</sup> | 1.05            | 2.31              | 3.161 (13)                | 137.5                       |

Symmetry code(s): (i)  $x, -y+2, z-1/2$ ; (ii)  $-y+1, -z+1, -x+1$ .

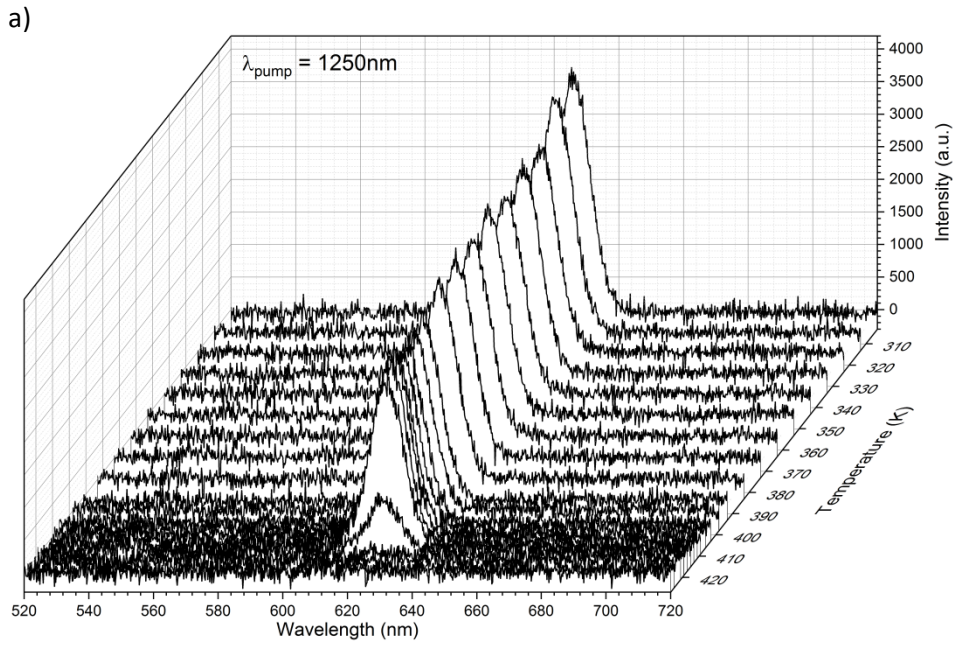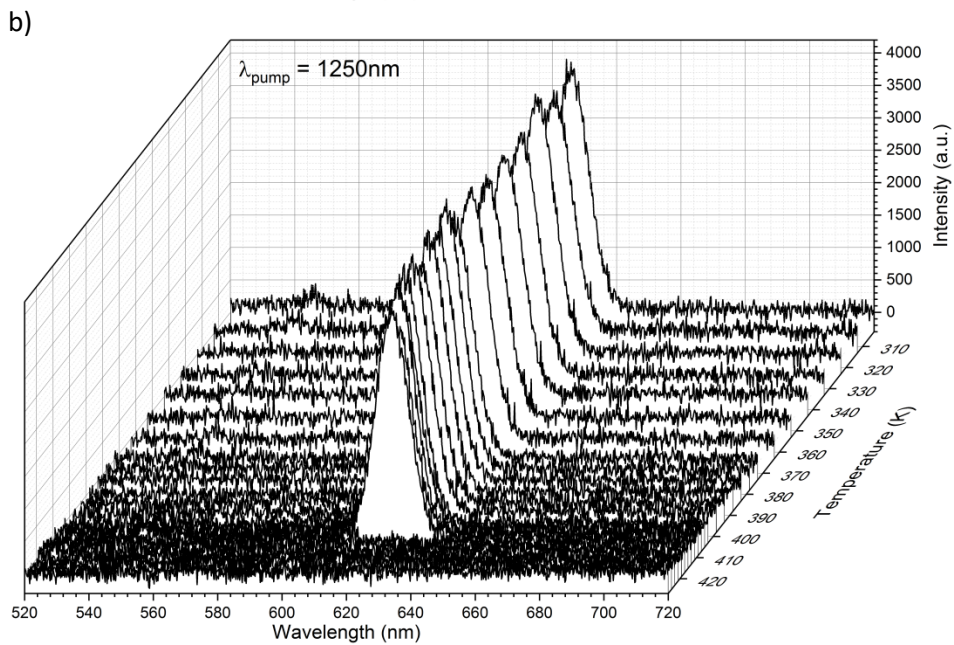

**Fig. S3.** Spectra obtained upon irradiation with the 1250 nm femtosecond laser pulses for TMAO-Co between 303K and 427K a) heating runs and b) cooling runs.

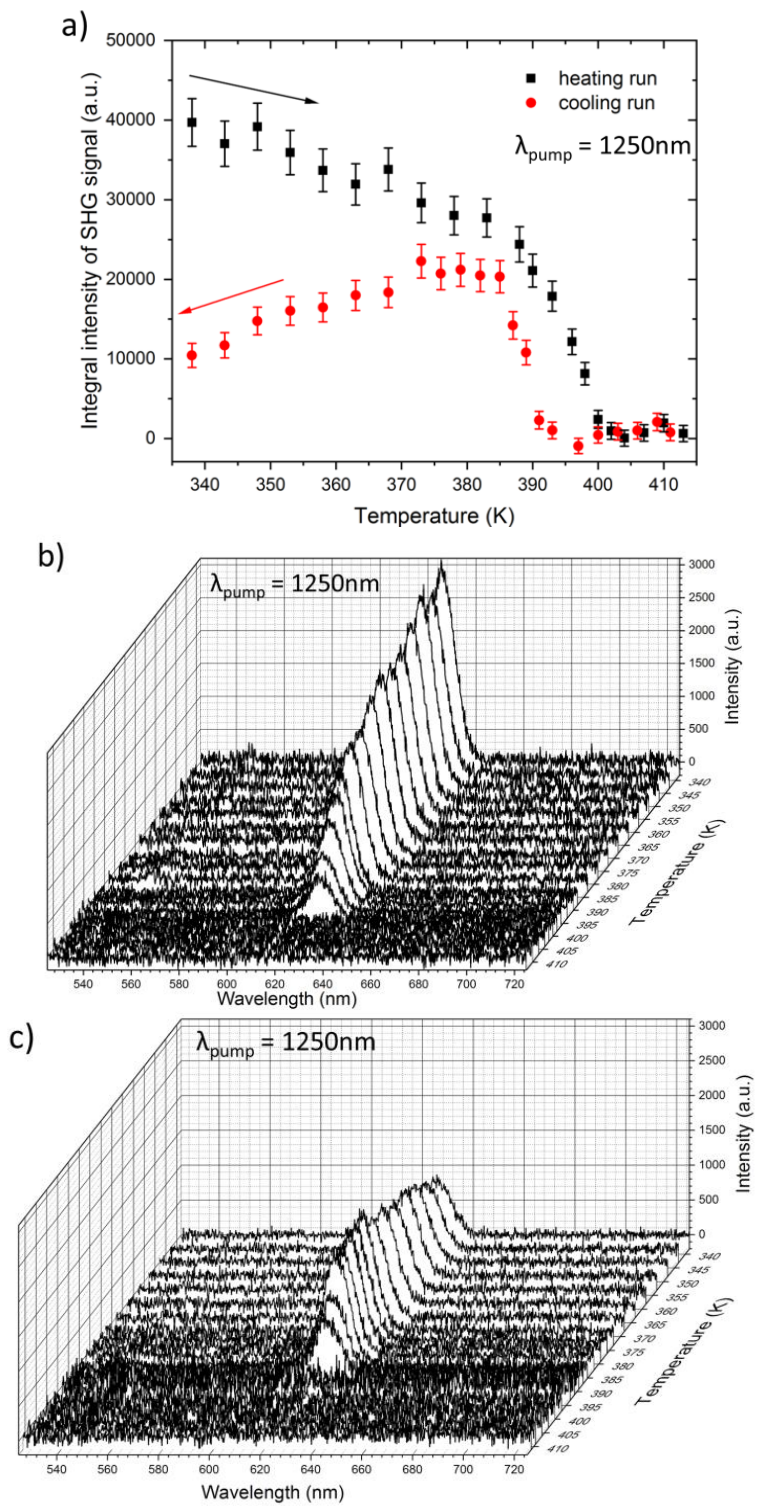

**Fig. S4.** a) Plots of integral intensity of SHG signal of **TMAO-Fe** for heating and cooling runs. b) Spectra obtained upon irradiation with 1250 nm femtosecond laser pulses of **TMAO-Fe** between 338 and 413 K on heating. c) Spectra obtained upon irradiation with 1250 nm femtosecond laser pulses of **TMAO-Fe** between 338 and 411 K on cooling.



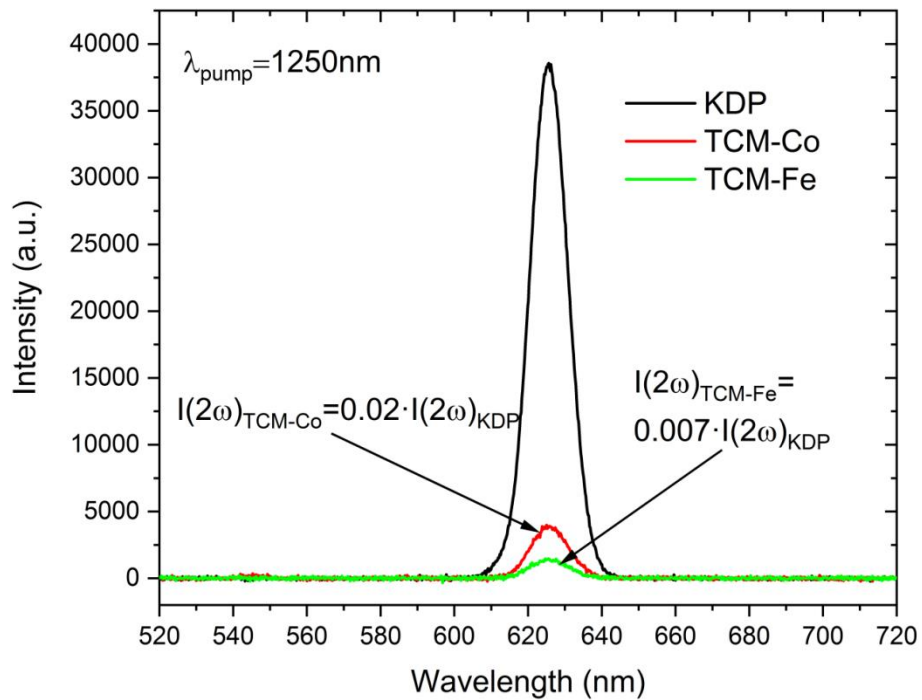

**Fig. S5.** SHG traces for **TMAO-Fe** (green), **TMAO-Co** (red) and that of KDP (black) obtained upon irradiation with 1250 nm femtosecond laser pulses. Signal collection time was equal to 6000 ms for **TMAO-Co** and **TMAO-Fe**, and 1200 ms for KDP; for clarity of presentation signal intensities are not normalized to the same integration time.

As noted in the main paper, in contrast with many molecular perovskites, **TMAO-Fe** undergoes a distinct “bond-switching” across its phase transition from the aristotype  $Fm\bar{3}m$  structure. In the low-symmetry  $Cc$  phase, as well as the reference  $C2/c$  structure, some  $K\cdots N$ - $C$ - $Fe$  links, which form the edges of the framework cage, break at the relatively ionic  $K\cdots N$  bonds. The potassium and the nitrogen atoms re-connect through the  $-OH$  moiety of the A-site TMAO<sup>+</sup> cation, forming a new  $K\cdots O$ - $H\cdots N$ - $C$ - $Fe$  edge of the framework cage. Therefore, when we perform functional group analysis, an equally valid alternative would be to consider the  $-OH$  group as part of the framework, leaving  $(CH_3)_3N\cdots$  alone as the A part. With this new separation formalism, we find that while the polarization along the  $c$ -axis stays almost unchanged, here the framework also contributes more than half of the polarization along the  $a$ -axis, while it has contributed little in the previous calculation. We can therefore further conclude that for the A-site TMAO<sup>+</sup> cation, the polarization along  $a$  comes roughly equally both from the trimethylammonium moiety and from the hydroxide group. Results from both sets of functional group analysis are presented in Table S5 below.

**Table S5.** Ferroelectric polarization of **TMAO-M**, calculated by DFT and a simple point-charge model. All values are given in units of  $\mu\text{C cm}^{-2}$ .

| M                                                                     | Direction                                                                |                                                                   | Berry phase  |              |              | Point charge                 |              |                              |              |
|-----------------------------------------------------------------------|--------------------------------------------------------------------------|-------------------------------------------------------------------|--------------|--------------|--------------|------------------------------|--------------|------------------------------|--------------|
|                                                                       |                                                                          |                                                                   | $a$          | $b$          | $c$          | $a$                          | $b$          | $c$                          |              |
| Fe                                                                    | <b>Total</b>                                                             |                                                                   | <b>0.937</b> | <b>0</b>     | <b>0.732</b> | <b>2.367</b><br><b>1.12*</b> | <b>0</b>     | <b>0.812</b><br><b>0.54*</b> |              |
|                                                                       | Separately,<br>where A= $[(CH_3)_3NOH]_2$<br>and $BX_3=KFe(CN)_6$        | $P_A$                                                             | 1.331        | 0            | -0.124       | 2.733                        | 0            | -0.009                       |              |
|                                                                       |                                                                          | $P_{BX_3}$                                                        | -0.240       | 0            | 1.080        | -0.596                       | 0            | 0.677                        |              |
|                                                                       |                                                                          | $P_A+P_{BX_3}$                                                    | 1.091        | 0            | 0.956        | 2.137                        | 0            | 0.668                        |              |
|                                                                       | Separately,<br>where<br>A= $[(CH_3)_3N]_2$<br>and $BX_3=(OH)_2KFe(CN)_6$ | $P_A$                                                             | 0.435        | 0            | 0.025        | 0.892                        | 0            | -0.177                       |              |
|                                                                       |                                                                          | $P_{BX_3}$                                                        | 0.598        | 0            | 0.977        | 1.177                        | 0            | 0.982                        |              |
|                                                                       |                                                                          | $P_A+P_{BX_3}$                                                    | 1.033        | 0            | 1.002        | 2.069                        | 0            | 0.805                        |              |
|                                                                       | Co                                                                       | <b>Total</b>                                                      |              | <b>0.868</b> | <b>0</b>     | <b>0.510</b>                 | <b>2.531</b> | <b>0</b>                     | <b>0.686</b> |
|                                                                       |                                                                          | Separately,<br>where A= $[(CH_3)_3NOH]_2$<br>and $BX_3=KCo(CN)_6$ | $P_A$        | 1.384        | 0            | -0.130                       | 2.828        | 0                            | 0.064        |
| $P_{BX_3}$                                                            |                                                                          |                                                                   | -0.307       | 0            | 1.111        | -0.310                       | 0            | 0.683                        |              |
| $P_A+P_{BX_3}$                                                        |                                                                          |                                                                   | 1.077        | 0            | 0.981        | 2.518                        | 0            | 0.747                        |              |
| Separately,<br>where A= $[(CH_3)_3N]_2$<br>and $BX_3=(OH)_2KCo(CN)_6$ |                                                                          | $P_A$                                                             | 0.459        | 0            | 0.029        | 1.005                        | 0            | -0.195                       |              |
|                                                                       |                                                                          | $P_{BX_3}$                                                        | 0.555        | 0            | 0.780        | 1.485                        | 0            | 1.118                        |              |
|                                                                       |                                                                          | $P_A+P_{BX_3}$                                                    | 1.014        | 0            | 0.809        | 2.490                        | 0            | 0.923                        |              |

\*result presented in ref. 1

(1) Xu, W. J.; Li, P. F.; Tang, Y. Y.; Zhang, W. X.; Xiong, R. G.; Chen, X. M. A Molecular Perovskite with Switchable Coordination Bonds for High-Temperature Multiaxial Ferroelectrics. *J. Am. Chem. Soc.* **2017**, *139*, 6369–6375.

**Table S6.** Normal modes of **TMAO-M** compounds (M=Co, Fe) in the phase I (II). The IR-active modes are marked in red, the Raman-active-in blue, the modes active in both IR and Raman spectra are in green and the silent ones - in black.

| Ion                                              | Vibration       | Free ion symmetry          | Factor group symmetry            |
|--------------------------------------------------|-----------------|----------------------------|----------------------------------|
|                                                  |                 | O <sub>h</sub>             | O <sub>h</sub> (C <sub>s</sub> ) |
| M(CN) <sub>6</sub> <sup>-</sup>                  | ν(CN)           |                            |                                  |
|                                                  | ν <sub>1</sub>  | A <sub>1g</sub>            | A <sub>1g</sub> (A'+A'')         |
|                                                  | ν <sub>3</sub>  | E <sub>g</sub>             | E <sub>g</sub> (2A'+2A'')        |
|                                                  | ν <sub>6</sub>  | T <sub>1u</sub>            | T <sub>1u</sub> (3A'+3A'')       |
|                                                  | ν(M-N)          |                            |                                  |
|                                                  | ν <sub>2</sub>  | A <sub>1g</sub>            | A <sub>1g</sub> (A'+A'')         |
|                                                  | ν <sub>4</sub>  | E <sub>g</sub>             | E <sub>g</sub> (2A'+2A'')        |
|                                                  | ν <sub>8</sub>  | T <sub>1u</sub>            | T <sub>1u</sub> (3A'+3A'')       |
|                                                  | δ(MCN)          |                            |                                  |
|                                                  | ν <sub>5</sub>  | T <sub>1g</sub>            | T <sub>1g</sub> (3A'+3A'')       |
|                                                  | ν <sub>7</sub>  | T <sub>1u</sub>            | T <sub>1u</sub> (3A'+3A'')       |
|                                                  | ν <sub>10</sub> | T <sub>2g</sub>            | T <sub>2g</sub> (3A'+3A'')       |
|                                                  | ν <sub>12</sub> | T <sub>2u</sub>            | T <sub>2u</sub> (3A'+3A'')       |
|                                                  | δ(CMC)          |                            |                                  |
|                                                  | ν <sub>9</sub>  | T <sub>1u</sub>            | T <sub>1u</sub> (3A'+3A'')       |
|                                                  | ν <sub>11</sub> | T <sub>2g</sub>            | T <sub>2g</sub> (3A'+3A'')       |
|                                                  | ν <sub>13</sub> | T <sub>2u</sub>            | T <sub>2u</sub> (3A'+3A'')       |
| T'                                               |                 | T <sub>1u</sub> (3A'+3A'') |                                  |
| L                                                |                 | T <sub>1g</sub> (3A'+3A'') |                                  |
| (CH <sub>3</sub> ) <sub>3</sub> NOH <sup>+</sup> | T'              |                            | T <sub>1u</sub> (3A'+3A'')       |
|                                                  | L               |                            | T <sub>1g</sub> (3A'+3A'')       |
| K <sup>+</sup>                                   | T'              |                            | T <sub>1u</sub> (3A'+3A'')       |
|                                                  | L               |                            | T <sub>1g</sub> (3A'+3A'')       |

**Table S7.** The room-temperature FT-IR and FT-Raman modes (in  $\text{cm}^{-1}$ ) of **TMAO-M**, where M=Co, Fe, and their proposed assignment. The modes involving vibrations of  $\text{CN}^-$  ions are denoted by red color.

| TMAO-Co |          | TMAO-Fe |          | Assignment          |
|---------|----------|---------|----------|---------------------|
| IR      | Raman    | IR      | Raman    |                     |
| 3118w,b |          | 3118w,b |          | vOH                 |
| 3062m   | 3063m    | 3061m   | 3060m    | vCH                 |
| 3053m   | 3052w    | 3051m   |          | vCH                 |
| 3045sh  | 3045m    | 3045sh  | 3045m    | vCH                 |
| 3036w   | 3038w    | 3037w   | 3038w    | vCH                 |
| 2968vw  | 2977m    | 2968vw  | 2977m    | vCH                 |
|         | 2956m    |         | 2956m    | vCH                 |
|         | 2870w    |         | 2870w    | overtone            |
| 2825m,b |          | 2824m,b |          | vOH                 |
|         | 2805w    |         | 2804w    | overtone            |
|         | 2794w    |         | 2795w    | overtone            |
| 2697m,b |          | 2695s,b |          | vOH                 |
| 2583s,b |          | 2582s,b |          | vOH                 |
|         | 2530vw,b |         | 2518vw,b | vOH                 |
| 2474m   | 2475vw,b | 2473m   | 2473vw,b | vOH                 |
| 2153m   | 2153vs   | 2137s   | 2136vs   | vCN( $\nu_1$ )      |
| 2140s   | 2138vs   | 2129s   | 2128vs   | vCN( $\nu_3$ )      |
| 2130sh  |          | 2118sh  |          | vCN( $\nu_6$ )      |
| 2126vs  | 2126m    | 2114vs  | 2114m    | vCN( $\nu_6$ )      |
|         |          | 2111sh  |          | vCN( $\nu_6$ )      |
| 2095vw  |          | 2084vw  | 2084vw   | overtone            |
| 2090vw  | 2090vw   | 2081vw  | 2080vw   | overtone            |
| 2082vw  | 2082vw   | 2070vw  | 2070vw   | overtone            |
| 1638m,b |          | 1640m,b |          | $\delta\text{OH}$   |
| 1555s   |          | 1557s   |          | $\delta\text{OH}$   |
| 1544s   |          | 1545s   |          | $\delta\text{OH}$   |
| 1480s   | 1483vw   | 1480s   | 1485vw   | $\delta\text{CH}_3$ |
| 1460s   |          | 1455s   |          | $\delta\text{CH}_3$ |
| 1449m   | 1450m    | 1446sh  | 1451m    | $\delta\text{CH}_3$ |
| 1442s   | 1443m    | 1443s   | 1443m    | $\delta\text{CH}_3$ |
| 1422w   | 1423vw   | 1421w   | 1422vw   | $\delta\text{CH}_3$ |
| 1402m   | 1403w    | 1403m   | 1403w    | $\delta\text{CH}_3$ |
| 1396w   |          |         |          | $\delta\text{CH}_3$ |
| 1269w   | 1269vw   | 1269w   | 1270vw   | $\rho\text{CH}_3$   |
| 1255s   | 1255mw   | 1255s   | 1255vw   | $\rho\text{CH}_3$   |
| 1127w   | 1127w    | 1127w   | 1126w    | $\rho\text{CH}_3$   |
| 1124w   |          | 1124w   |          | $\rho\text{CH}_3$   |
| 951s    | 952m     | 951s    | 951m     | vNO                 |
| 941w    | 941m     | 942w    | 941m     | vCN                 |
| 896vw   |          |         |          | overtone            |
| 858m    |          | 859     |          | $\gamma\text{OH}$   |
| 833s    |          | 834s    |          | $\gamma\text{OH}$   |

|       |       |       |       |                                    |
|-------|-------|-------|-------|------------------------------------|
| 754w  | 755m  | 756w  | 756m  | vCN                                |
| 748sh | 748sh | 746sh | 747sh | vCN                                |
| 561m  | 557vw | 522w  |       | $\rho$ NO                          |
| 515w  | 514w  | 511w  | 510w  | $\rho$ NO                          |
|       | 501vw |       | 501vw | $\delta$ MCN( $v_7$ )              |
| 486w  | 485w  | 487w  | 485w  | Skeletal def.                      |
| 457w  | 459w  | 457m  | 459w  | Skeletal def.                      |
| 447sh | 447vw |       | 441vw | Skeletal def.                      |
| 442w  | 441vw |       | 428sh | Skeletal def.                      |
| 430m  | 428w  | 421s  | 419vw | $\delta$ MCN( $v_{10}$ )           |
| 419s  |       |       |       | $\delta$ MCN( $v_{10}$ )           |
| 411m  | 409w  |       | 400w  | $\delta$ MCN( $v_{10}$ )           |
|       | 402sh |       | 386sh | $\nu$ MC( $v_2$ ) + $\delta$ CNC   |
|       | 396m  |       | 376m  | $\nu$ MC( $v_2$ ) + $\delta$ CNC   |
|       | 381w  |       |       | $\nu$ MC( $v_4$ ) + $\delta$ CNC   |
|       | 376sh |       |       | $\nu$ MC( $v_4$ ) + $\delta$ CNC   |
|       | 197w  |       | 193w  | $\tau$ CH <sub>3</sub>             |
|       | 160sh |       | 153sh | $\delta$ CMC( $v_{11}$ ) + lattice |
|       | 148m  |       | 141s  | $\delta$ CMC( $v_{11}$ ) + lattice |
|       | 131sh |       | 126sh | lattice                            |

**Table S8.** The observed IR and Raman modes (in cm<sup>-1</sup>) of **TMAO-Co** and their proposed assignment.

| IR      |         |         | Raman |        |        | Assignment |
|---------|---------|---------|-------|--------|--------|------------|
| 80 K    | 280 K   | 430 K   | 80 K  | 280 K  | 430 K  |            |
|         |         | 3433m   |       |        |        | vOH        |
|         |         | 3234s   |       |        |        | vOH        |
| 3131w,b | 3118w,b |         |       |        |        | vOH        |
| 3101w,b |         |         |       |        |        | vOH        |
| 3063w   | 3062m   | 3061w   | 3064m | 3063m  | 3059sh | vCH        |
| 3053w   | 3053m   | 3052w   | 3056m | 3057m  | 3051m  | vCH        |
| 3045sh  | 3046sh  |         | 3047w | 3048w  |        | vCH        |
| 3034w   | 3036w   |         | 3038w | 3038w  |        | vCH        |
| 3026vw  | 3024vw  |         | 3035w |        |        | vCH        |
| 3008vw  |         |         |       |        |        | vCH        |
| 2993vw  | 2991vw  | 2991vw  |       |        |        | vCH        |
| 2971vw  | 2970vw  | 2972vw  | 2979m | 2977m  | 2976m  | vCH        |
|         |         |         | 2970w |        |        | vCH        |
|         |         |         | 2956m | 2956m  | 2957sh | vCH        |
|         |         | 2921w,b |       |        |        | vOH        |
|         |         |         | 2867w | 2869w  | 2880vw | overtone   |
| 2828m   | 2827m,b |         |       | 2838vw |        | vOH        |
| 2816m   |         |         |       |        |        | vOH        |
|         |         |         | 2803w | 2804w  | 2805vw | overtone   |
|         |         |         | 2793w | 2794w  |        | overtone   |

|        |         |          |        |        |        |                             |
|--------|---------|----------|--------|--------|--------|-----------------------------|
| 2751w  |         |          |        |        |        | vOH                         |
| 2741w  | 2731sh  |          |        |        |        | vOH                         |
| 2703m  | 2695m,b |          |        |        |        | vOH                         |
| 2590sh |         |          |        |        |        | vOH                         |
| 2549s  | 2581s,b |          |        |        |        | vOH                         |
| 2511m  |         |          |        |        |        | vOH                         |
| 2483s  | 2475s,b |          |        |        |        | vOH                         |
| 2471sh |         |          |        |        |        | vOH                         |
| 2157m  | 2153m   |          | 2156vs | 2152vs | 2136s  | vCN(v <sub>1</sub> )        |
| 2142s  | 2139s   |          | 2141s  | 2138s  | 2124m  | vCN(v <sub>3</sub> )        |
| 2133sh | 2129sh  |          | 2133m  |        |        | vCN(v <sub>6</sub> )        |
| 2129vs | 2127vs  | 2114vs   | 2129m  | 2127m  |        | vCN(v <sub>6</sub> )        |
| 1663m  | 1639m,b | 1635vw,b |        |        |        | δOH                         |
| 1623m  |         |          |        |        |        | δOH                         |
| 1566m  | 1551m   |          |        |        |        | δOH                         |
| 1551m  | 1544m   | 1498m,b  |        |        |        | δOH                         |
| 1481m  | 1480m   | 1485s    | 1484vw | 1485vw |        | δCH <sub>3</sub>            |
| 1461w  | 1458sh  |          |        |        |        | δCH <sub>3</sub>            |
| 1451m  | 1448sh  |          |        |        |        | δCH <sub>3</sub>            |
| 1441m  | 1443m   | 1445s    | 1441w  | 1442w  | 1445w  | δCH <sub>3</sub>            |
| 1419vw | 1421vw  |          | 1420vw |        |        | δCH <sub>3</sub>            |
| 1400w  | 1403w   | 1407w    | 1408vw | 1401w  | 1403vw | δCH <sub>3</sub>            |
|        |         |          | 1400w  |        |        | δCH <sub>3</sub>            |
| 1273w  | 1269w   |          | 1272vw | 1270vw |        | ρCH <sub>3</sub>            |
| 1259m  | 1255m   | 1240m    | 1255vw | 1254vw |        | ρCH <sub>3</sub>            |
| 1128w  | 1127w   | 1123w    | 1127vw | 1126w  |        | ρCH <sub>3</sub>            |
| 1124w  | 1123w   |          |        |        |        | ρCH <sub>3</sub>            |
| 954m   | 952m    | 954m     | 953m   | 951m   | 951w   | vNO                         |
| 951sh  |         |          |        |        |        | vNO                         |
| 944w   | 942m    | 936m     | 945w   | 943sh  | 934w   | vCN                         |
|        |         |          | 938w   |        |        | vCN                         |
|        | 896vw   | 890w     |        |        |        | overtone                    |
| 871m   | 858m    |          | 868vw  |        |        | γOH                         |
| 848m   | 835m    |          | 847vw  |        |        | γOH                         |
| 763vw  |         |          | 762w   |        |        | vCN                         |
| 756w   | 756w    | 761w     | 756m   | 755m   | 761w   | vCN                         |
| 746w   | 747w    |          | 746w   | 749sh  | 748sh  | vCN                         |
| 565w   | 561w    | 554w     | 564vw  | 560vw  |        | ρNO                         |
|        |         |          | 504vw  |        |        | δCoCN(v <sub>7</sub> )      |
|        |         |          | 486vw  | 485vw  | 495vw  | Skeletal def.               |
|        |         |          | 459vw  | 459vw  | 456vw  | Skeletal def.               |
|        |         |          | 442w   | 441w   |        | Skeletal def.               |
|        |         |          | 430w   | 427w   |        | δCoCN(v <sub>10</sub> )     |
|        |         |          | 413w   | 409w   |        | δCoCN(v <sub>10</sub> )     |
|        |         |          | 405sh  |        |        | vCoC(v <sub>2</sub> ) +δCNC |
|        |         |          | 400m   | 397m   | 386m   | vCoC(v <sub>2</sub> ) +δCNC |
|        |         |          | 381w   | 381w   |        | vCoC(v <sub>4</sub> ) +δCNC |
|        |         |          | 342vw  | 341vw  |        | δCoCN(v <sub>5</sub> )      |

|       |       |      |                                       |
|-------|-------|------|---------------------------------------|
| 303vw |       |      | ?                                     |
| 290vw |       |      | ?                                     |
| 225vw |       |      | lattice                               |
| 211sh |       |      | $\tau\text{CH}_3$                     |
| 203w  | 197w  |      | $\tau\text{CH}_3$                     |
| 170sh |       |      | $\delta\text{CCoC}(v_{11})$ + lattice |
| 164w  | 159sh |      | $\delta\text{CCoC}(v_{11})$ + lattice |
| 148m  | 148m  | 160m | $\delta\text{CCoC}(v_{11})$ + lattice |
| 129w  | 128sh |      | lattice                               |
| 86w   | 84w   |      | lattice                               |

Key: s-very strong, s-strong, m-medium, w-weak, vw-very weak, sh-shoulder;  $v_s$ -symmetric stretching,  $v_{as}$ -asymmetric stretching,  $\delta$ -in-plane bending (scissoring),  $\rho$ -rocking,  $\omega$ -wagging,  $\tau$ -twisting (torsion),  $\gamma$ -out-of-plane bending, T-translation, L-libration.

**Table S9.** The observed IR modes (in  $\text{cm}^{-1}$ ) of **TMAO-Fe** and their proposed assignment.

|         |         | IR      |  | Assignment          |
|---------|---------|---------|--|---------------------|
| 80 K    | 280 K   | 390 K   |  |                     |
|         |         | 3428sh  |  | $\nu\text{OH}$      |
|         |         | 3228m   |  | $\nu\text{OH}$      |
| 3133w,b | 3120w,b | 3150m   |  | $\nu\text{OH}$      |
| 3107w,b |         |         |  | $\nu\text{OH}$      |
| 3060m   | 3060m   | 3059m   |  | $\nu\text{CH}$      |
| 3053m   | 3050m   | 3050m   |  | $\nu\text{CH}$      |
| 3049m   |         |         |  | $\nu\text{CH}$      |
| 3042sh  | 3043sh  |         |  | $\nu\text{CH}$      |
| 3033w   | 3035w   |         |  | $\nu\text{CH}$      |
| 3008vw  |         |         |  | $\nu\text{CH}$      |
| 2992vw  |         | 2985w   |  | $\nu\text{CH}$      |
| 2970vw  | 2967vw  | 2955w   |  | $\nu\text{CH}$      |
| 2916vw  | 2917vw  | 2923w   |  | $\nu\text{CH}$      |
| 2830w   | 2824w   |         |  | $\nu\text{OH}$      |
| 2818w   |         |         |  | $\nu\text{OH}$      |
| 2733sh  |         |         |  | $\nu\text{OH}$      |
| 2699m   | 2694m,b |         |  | $\nu\text{OH}$      |
| 2686m   |         |         |  | $\nu\text{OH}$      |
| 2577sh  | 2572s,b |         |  | $\nu\text{OH}$      |
| 2538s   |         |         |  | $\nu\text{OH}$      |
| 2483s   | 2475s,b |         |  | $\nu\text{OH}$      |
| 2468sh  |         |         |  | $\nu\text{OH}$      |
| 2140s   | 2137s   | 2134w   |  | $\nu\text{CN}(v_1)$ |
| 2132s   | 2129s   | 2126w   |  | $\nu\text{CN}(v_3)$ |
| 2121m   | 2118sh  | 2113m   |  | $\nu\text{CN}(v_3)$ |
| 2117vs  | 2115vs  | 2104s   |  | $\nu\text{CN}(v_6)$ |
|         |         | 2077m   |  | $\nu\text{CN}(v_6)$ |
| 1661m   | 1639m,b | 1666w,b |  | $\delta\text{OH}$   |
| 1621m   |         |         |  | $\delta\text{OH}$   |
| 1567m   | 1557m   |         |  | $\delta\text{OH}$   |

|        |        |        |                     |
|--------|--------|--------|---------------------|
| 1553m  | 1546m  | 1549w  | $\delta\text{OH}$   |
| 1481m  | 1480m  | 1479s  | $\delta\text{CH}_3$ |
| 1461m  | 1460m  | 1463s  | $\delta\text{CH}_3$ |
| 1441m  | 1441m  | 1445s  | $\delta\text{CH}_3$ |
| 1419w  | 1422w  |        | $\delta\text{CH}_3$ |
| 1401m  | 1403m  | 1404w  | $\delta\text{CH}_3$ |
| 1272w  | 1269w  |        | $\rho\text{CH}_3$   |
| 1261m  | 1256m  | 1252w  | $\rho\text{CH}_3$   |
| 1245w  |        | 1241sh | $\rho\text{CH}_3$   |
|        |        | 1164vw | $\rho\text{CH}_3$   |
| 1132vw |        |        | $\rho\text{CH}_3$   |
| 1128vw | 1127vw |        | $\rho\text{CH}_3$   |
| 1125vw | 1124sh | 1125vw | $\rho\text{CH}_3$   |
|        |        | 1049w  | $\rho\text{CH}_3$   |
| 953s   | 952s   | 952m   | $\nu\text{NO}$      |
| 950sh  |        |        | $\nu\text{NO}$      |
| 944m   | 941m   | 940m   | $\nu\text{CN}$      |
| 871m   | 859m   | 849sh  | $\gamma\text{OH}$   |
| 847m   | 837m   | 833m   | $\gamma\text{OH}$   |
| 757w   | 757w   | 757w   | $\nu\text{CN}$      |
| 745vw  | 746vw  | 744vw  | $\nu\text{CN}$      |

---



a)

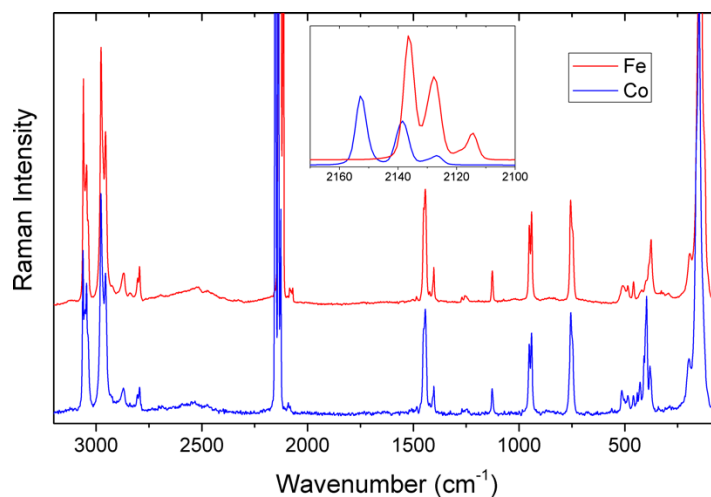

b)

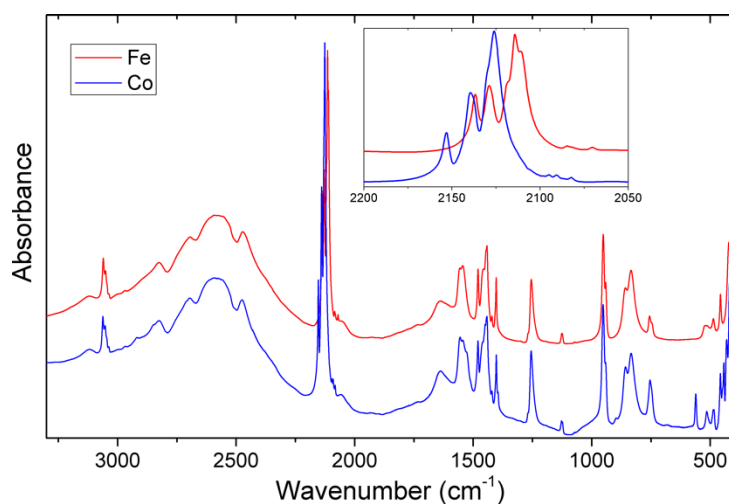

c)

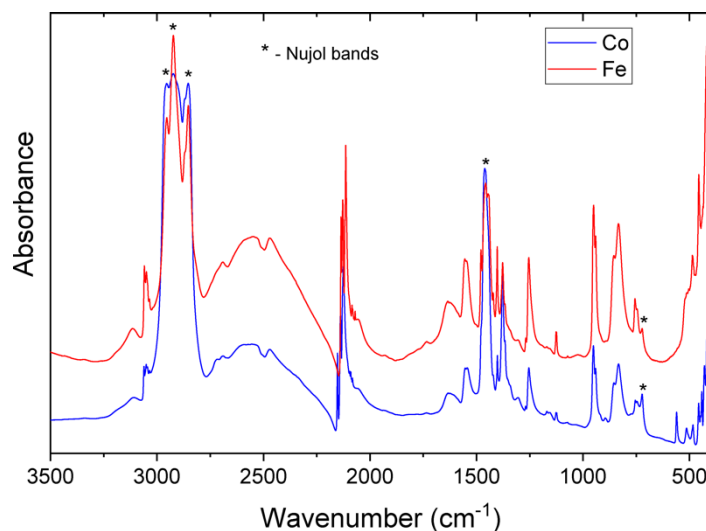

**Fig. S6.** a) The room-temperature FT-Raman spectra for **TMAO-Co** and **TMAO-Fe**. The insert shows the details of the most intense Raman bands. b) The room-temperature FT-IR spectra in KBr pellets and the 3300-400  $\text{cm}^{-1}$  range. The insert shows the details of the most intense IR bands. c) The room-temperature FT-IR spectra of the studied compounds in Nujol mull and the 3300-400  $\text{cm}^{-1}$  range. The asterisks denote Nujol bands.

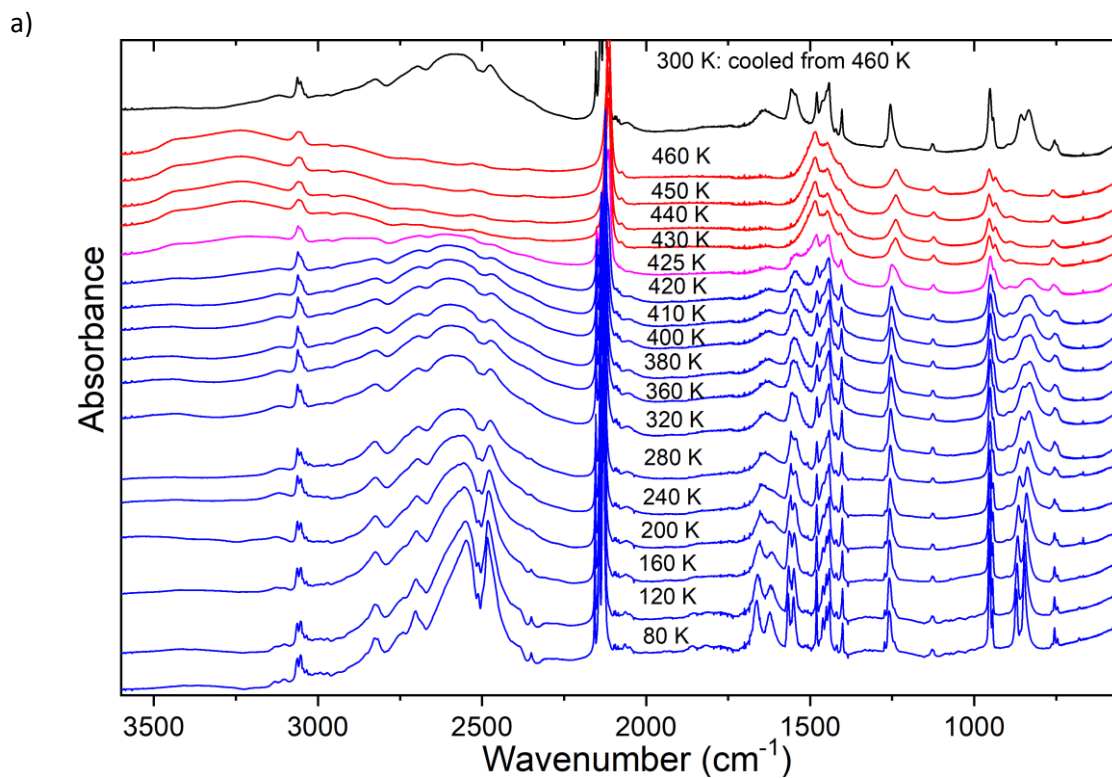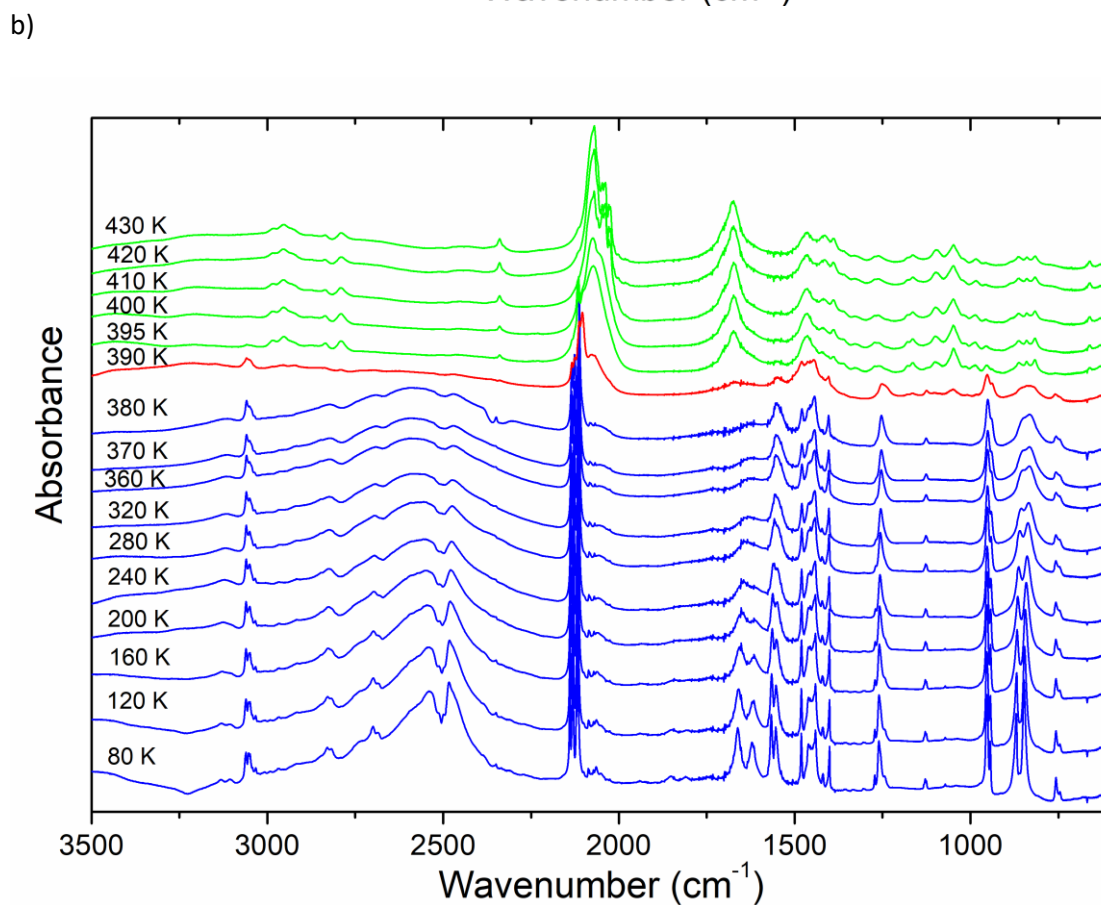

**Fig. S7.** The temperature-dependent IR spectra of a) **TMAO-Co** and b) **TMAO-Fe**.
